# Supplementary material for: Ibuprofen mediates histone modification to diminish cancer cell stemness properties via a COX2-dependent manner
Source: PubMed Central journal article supplement (PMC7463005; doi:10.1038/s41416-020-0906-7), 2020-06-12
Supplement: 41416_2020_906_MOESM1_ESM.pdf [file 41416_2020_906_MOESM1_ESM.pdf]

**Supplemental Table 1. Primer sequences**

| Name                 | Sequence                       |
|----------------------|--------------------------------|
| ICAM3-H-RT-F         | CCCCAGCACTTGAAATGGAAAGA        |
| ICAM3-H-RT-R         | AGGGTCAGTAACACCGCCACGAA        |
| CCL16-RT-F           | CTTATCATTACTTCGGCTTCTCGC       |
| CCL16-RT-R           | GGCCTTTTCTGTATCCCACCACTA       |
| PDE3A-RT-F           | GATGATAAATACGGATGTCTGTCTGG     |
| PDE3A -RT-R          | GACAAGGAAACGGAAATGCTTAA        |
| PRTN3-RT-F           | ACAACACTACGACGCGGAGAACAACACTGA |
| PRTN3-RT-R           | GAAGAAGGTGACCACGGTGACATTGAG    |
| TRAF6-RT-F           | GCACGCCACCTACAAGAG             |
| TRAF6-RT-R           | CAGGGCTATGAATCACAACA           |
| BCAR1-RT-F           | CAGTTTGAACGACTGGAACAGGAGGTG    |
| BCAR1-RT-R           | AGCTTGTGGGCGCTGAGGATGAC        |
| IL-1 $\alpha$ -RT-F  | ATTGTATGTGACTGCCCAAGATG        |
| IL-1 $\alpha$ -RT-R  | GTTTCCCAGAAGAAGAGGAGGTT        |
| IL-1 $\beta$ -RT-F   | GGCGGCATCCAGCTACGAATCTC        |
| IL-1 $\beta$ -RT-R   | AAGGTCTGTGGGCAGGGAACCAG        |
| NF- $\kappa$ B1-RT-F | AAAAGGACCCTGAAGGTTGTGAC        |
| NF- $\kappa$ B1-RT-R | AAGGTGGATGATTGCTAAGTGTAAG      |

|                     |                                                               |
|---------------------|---------------------------------------------------------------|
| IkB $\kappa$ B-RT-F | GGCAGTCTTTGCACATCATTCGT                                       |
| IkB $\kappa$ B-RT-R | TCACCGTTCCATTCAAGTCTTCG                                       |
| SOX2-RT-F           | TGGAGCAACGGCAGCTACAGCATG                                      |
| SOX2-RT-R           | GGAGTGGGAGGAAGAGGTAACCACAGG                                   |
| OCT4-RT-F           | TGGGAAGGTATTTCAGCCAAACGA                                      |
| OCT4-RT-R           | ACCGAGGAGTACAGTGCAGTGAAGTGA                                   |
| ICAM3-M-RT-F        | GCAGAACAGGAAGGCACCAAACAG                                      |
| ICAM3-M-RT-R        | CTCAAAGTCAGAAGAGGAGTCGGGAAG                                   |
| ICAM3-CHIP-3-F      | CTTGCACAGGAACAGTAGCG                                          |
| ICAM3-CHIP-3-R      | ACGAAGAACGGGATCCC                                             |
| COX1-sh             | AAAAGGAGTACAGCTACGAGCAGTTTTGGATCCAAAACCTGCTCGTAGCTGT<br>ACTCC |
| COX2-sh             | AAAAGCGCTCAGCCATACAGCAAATTTGGATCCAAATTTGCTGTATGGCTG<br>AGCGC  |

**Supplemental Table 2. Antibodies List**

| Antibody |                   | Clone, Cat #            | Vendor | City, State, Country |
|----------|-------------------|-------------------------|--------|----------------------|
| ICAM3    | Rabbit monoclonal | EPR3994,<br>ab109405    | Abcam  | Hong Kong,<br>China  |
| CCL16    | Rabbit monoclonal | EPR4452(2),<br>ab134917 | Abcam  | Hong Kong,<br>China  |
| PDE3A    | Rabbit monoclonal | EPR11601,<br>ab169534   | Abcam  | Hong Kong,<br>China  |

|                |                   |                      |                             |                        |
|----------------|-------------------|----------------------|-----------------------------|------------------------|
| PRTN3          | Rabbit monoclonal | EPR6227,<br>ab133613 | Abcam                       | Hong Kong,<br>China    |
| IL-1 $\alpha$  | Rabbit polyclonal | ab9614               | Abcam                       | Hong Kong,<br>China    |
| OCT4           | Rabbit polyclonal | ab19857              | Abcam                       | Hong Kong,<br>China    |
| NANOG          | Rabbit monoclonal | ab109250             | Abcam                       | Hong Kong,<br>China    |
| ALDH1A1        | Rabbit monoclonal | ab52492              | Abcam                       | Hong Kong,<br>China    |
| SOX2           | Rabbit polyclonal | H-65,<br>sc-20088X   | Santa Cruz<br>Biotechnology | Santa Cruz, CA,<br>USA |
| TRAF6          | Rabbit polyclonal | H-274, sc-7221       | Santa Cruz<br>Biotechnology | Santa Cruz, CA,<br>USA |
| BCAR1          | Rabbit polyclonal | C-20, sc-860         | Santa Cruz<br>Biotechnology | Santa Cruz, CA,<br>USA |
| $\beta$ -actin | Mouse monoclonal  | sc-47778             | Santa Cruz<br>Biotechnology | Santa Cruz, CA,<br>USA |
| IL-1 $\beta$   | Mouse monoclonal  | 12242                | Cell Signal<br>Technology   | Danvers, MA,<br>USA    |
| p-IKK $\beta$  | Mouse monoclonal  | 16A6, 2697L          | Cell Signal<br>Technology   | Danvers, MA,<br>USA    |
| H3K4-3Me       | Rabbit monoclonal | 9783 (Kit)           | Cell Signal<br>Technology   | Danvers, MA,<br>USA    |
| H3K9-3Me       | Rabbit monoclonal | 9783 (Kit)           | Cell Signal<br>Technology   | Danvers, MA,<br>USA    |
| H3K27-3Me      | Rabbit monoclonal | 9783 (Kit)           | Cell Signal<br>Technology   | Danvers, MA,<br>USA    |
| H3K36-3Me      | Rabbit monoclonal | 9783 (Kit)           | Cell Signal<br>Technology   | Danvers, MA,<br>USA    |
| H3K79-3Me      | Rabbit monoclonal | 9783 (Kit)           | Cell Signal<br>Technology   | Danvers, MA,<br>USA    |
| H3             | Rabbit monoclonal | 9783 (Kit)           | Cell Signal<br>Technology   | Danvers, MA,<br>USA    |
| H3K18-Ac       | Rabbit monoclonal | 9927 (Kit)           | Cell Signal<br>Technology   | Danvers, MA,<br>USA    |
| H3K27-Ac       | Rabbit monoclonal | 9927 (Kit)           | Cell Signal<br>Technology   | Danvers, MA,<br>USA    |
| HDAC1          | Mouse monoclonal  | 9928 (Kit)           | Cell Signal<br>Technology   | Danvers, MA,<br>USA    |
| HDAC2          | Mouse monoclonal  | 9928 (Kit)           | Cell Signal<br>Technology   | Danvers, MA,<br>USA    |
| HDAC3          | Mouse monoclonal  | 9928 (Kit)           | Cell Signal<br>Technology   | Danvers, MA,<br>USA    |

|       |                   |            |                        |                  |
|-------|-------------------|------------|------------------------|------------------|
| HDAC4 | Rabbit monoclonal | 9928 (Kit) | Cell Signal Technology | Danvers, MA, USA |
| HDAC5 | Mouse monoclonal  | 9928 (Kit) | Cell Signal Technology | Danvers, MA, USA |
| KDM6A | Rabbit monoclonal | 33510      | Cell Signal Technology | Danvers, MA, USA |
| KDM6B | Rabbit monoclonal | 3457       | Cell Signal Technology | Danvers, MA, USA |
| COX1  | Rabbit monoclonal | 9896       | Cell Signal Technology | Danvers, MA, USA |
| COX2  | Rabbit monoclonal | 12282      | Cell Signal Technology | Danvers, MA, USA |

# Supplemental figure 1

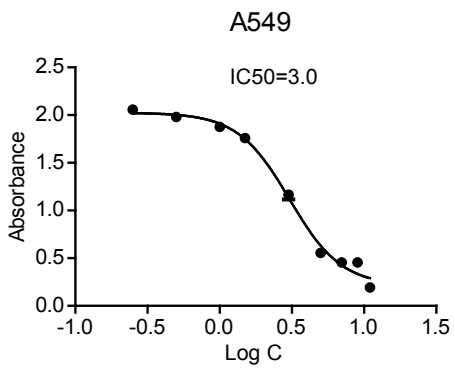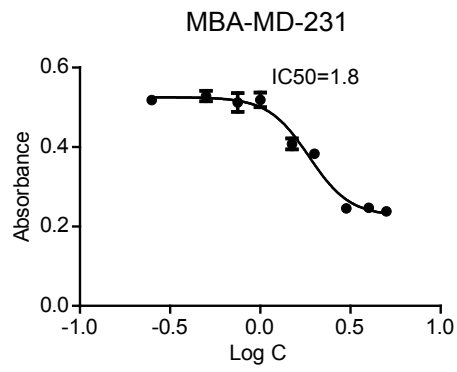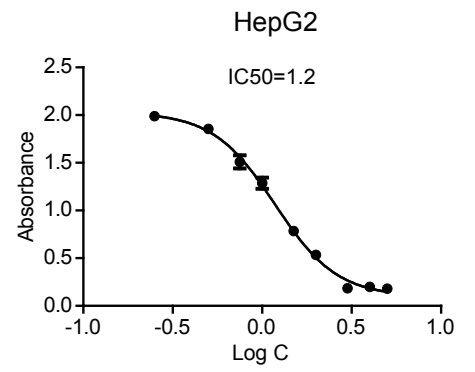

**Fig. S1 The work concentration of ibuprofen was tested in various cancer cells.**

The cytotoxicity assay was performed on lung cancer cell A549, breast cancer cell MDA-MB-231 and liver cancer cell HepG2. The IC<sub>50</sub> of ibuprofen on three cell lines were 3.0, 1.8, 1.2 respectively.

# Supplemental figure 2

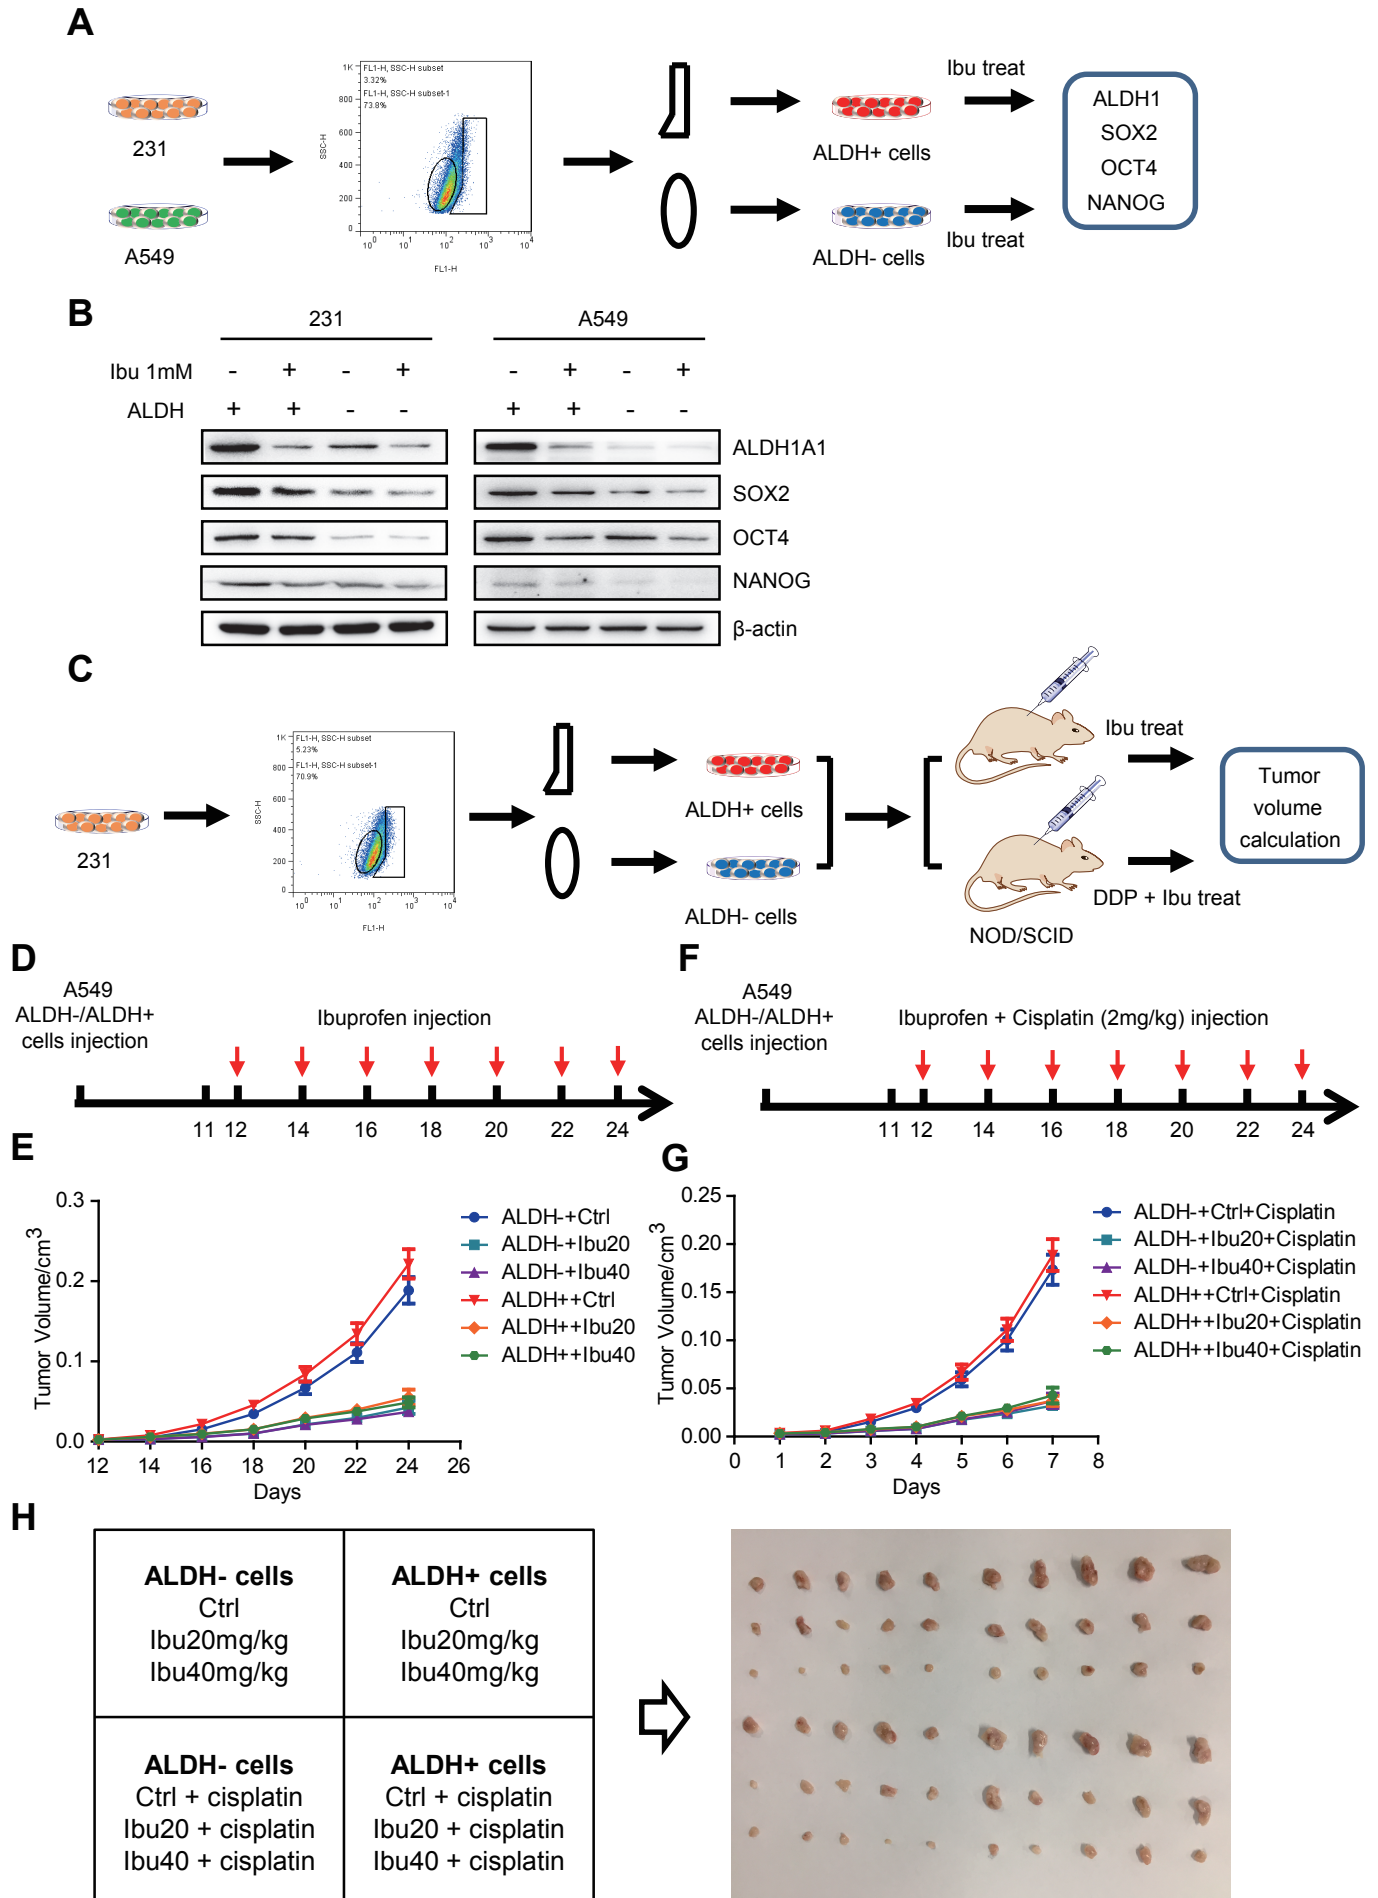

**Fig. S2 The effects of ibuprofen on CSC or non-CSC cells was detected.**

(A) Schematic model of CSC or non-CSC cell sorting. (B) Western blot to detect the stemness markers (ALDH1A1, SOX2, OCT4 and NANOG) in ALDH<sup>+</sup> or ALDH<sup>-</sup> cells treated with ibuprofen sorted from 231 and A549 cell lines. (C) Schematic model of the *in vivo* experiment to check the role of ibuprofen on CSC or non-CSC cells. (D) Schema of the *in vivo* model established by subcutaneous implantation of ALDH<sup>+</sup>/ALDH<sup>-</sup> cells into the 4<sup>th</sup> pair of mammary fat pad of nude mice. (E) Tumor growth curve of ALDH<sup>+</sup>/ALDH<sup>-</sup> cells with or without ibuprofen treatment. (F) Schema of the chemo-resistance model established by subcutaneous implantation of ALDH<sup>+</sup>/ALDH<sup>-</sup> cells into the 4<sup>th</sup> pair of mammary fat pad of nude mice. (G) Tumor growth curve of ALDH<sup>+</sup>/ALDH<sup>-</sup> cells with or without ibuprofen treatment in the presence of cisplatin. (H) The representative tumors separated from each groups were shown.



# Supplemental figure 3

**A**

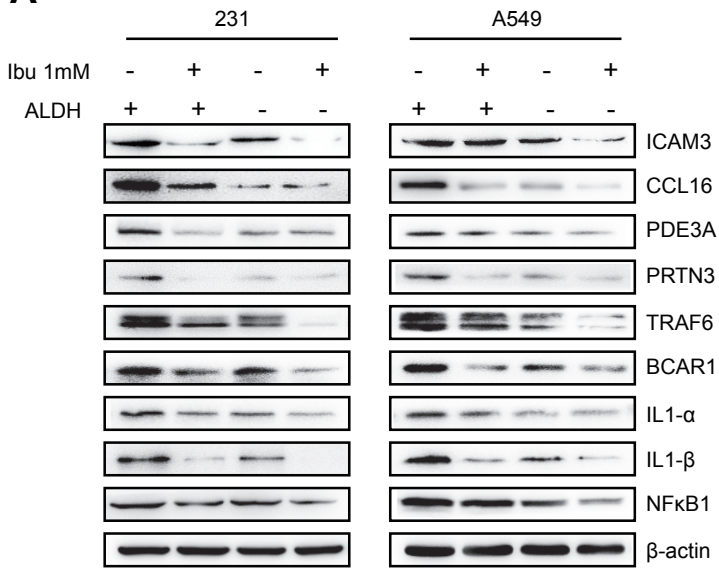

**B**

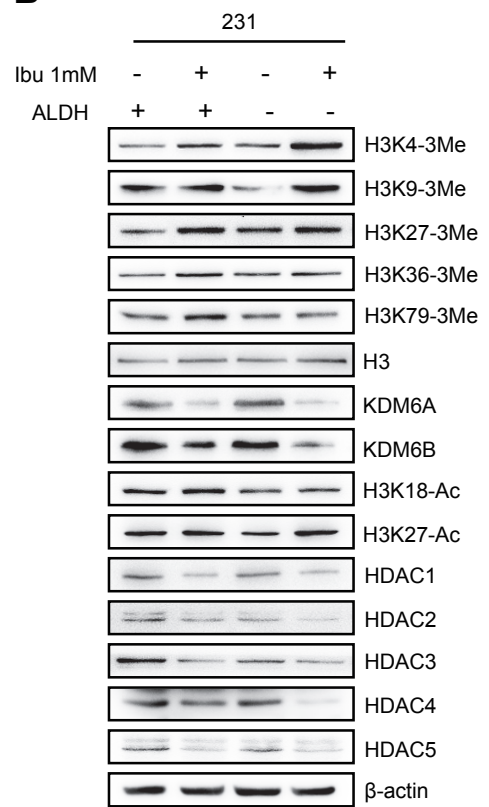

**Fig. S3 Ibuprofen effects the inflammation related genes and H3 modification markers expression in ALDH+ and ALDH- cells.**

(A) Western blot to detect the inflammation related genes expression in ALDH+ and ALDH- cells with or without ibuprofen treatment. (B) Western blot to detect the H3 modification markers expression in ALDH+ and ALDH- cells with or without ibuprofen treatment.
